# Supplementary material for: Novel Long Noncoding RNA miR205HG Functions as an Esophageal Tumor-Suppressive Hedgehog Inhibitor
Source: PubMed Central journal article supplement (PMC8038513; doi:10.3390/cancers13071707), 2021-04-03
Supplement: cancers-13-01707-s001.pdf [file cancers-13-01707-s001.pdf]

**SUPPLEMENTARY INFORMATION****Novel Long Non-Coding RNA *miR205HG* Functions as An Esophageal Tumor-Suppressive  
Hedgehog Inhibitor**

Jee Hoon Song<sup>1,2\*</sup>, Alan H. Tieu<sup>1,3\*</sup>, Yulan Cheng<sup>1\*</sup>, Ke Ma<sup>1</sup>, Venkata S. Akshintala<sup>1</sup>, Cem  
Simsek<sup>1</sup>, Vishnu Prasath<sup>1</sup>, Eun Ji Shin<sup>1</sup>, Saowanee Ngamruengphong<sup>1</sup>, Mouen A. Khashab<sup>1</sup>,  
John M. Abraham<sup>1</sup>, Stephen J. Meltzer<sup>1</sup>

**Table of contents**

|                                     |            |
|-------------------------------------|------------|
| Supplementary Materials and Methods | Page 2-14  |
| Supplementary Source Supplementary  | Page 15-16 |
| Figures                             | Page 17-19 |

**Supplementary Materials and Methods****OE\_33 Cell Line****SKGT4 Cell Line****JHU-Eso-Ad1 Cell Line****Flo-1 Cell Line****QHTRT Cell Line****GiHTRT Cell Line**

## Cell Line Short Tandem Repeat (STR) Profile Report

**Principal Investigator:** Yulan Cheng  
**Lab Group:** Meltzer  
**Institution:** Johns Hopkins University, GI  
**Cell Line ID:** oe33  
**Report Date:** November 5, 2018  
**Submitting Researcher:** Yulan Cheng  
**Sample Type Submitted:** cultured cells  
**GeneSifter Tracking ID:** 150777  
**Profile Kit Requested:** GenePrint 10 (Promega)

### STR Profile:

| Loci    | oe33    |
|---------|---------|
| AMEL    | X       |
| CSF1PO  | 10,11   |
| D13S317 | 14      |
| D16S539 | 12      |
| D21S11  | 29,31.2 |
| D5S818  | 11      |
| D7S820  | 9,10    |
| TH01    | 7,8     |
| TPOX    | 8,11    |
| vWA     | 14,17   |

» Loci with one allele listed are homozygous for that STR marker.

*e-Signature Director of Laboratory:*

### STR Graphic Profile:

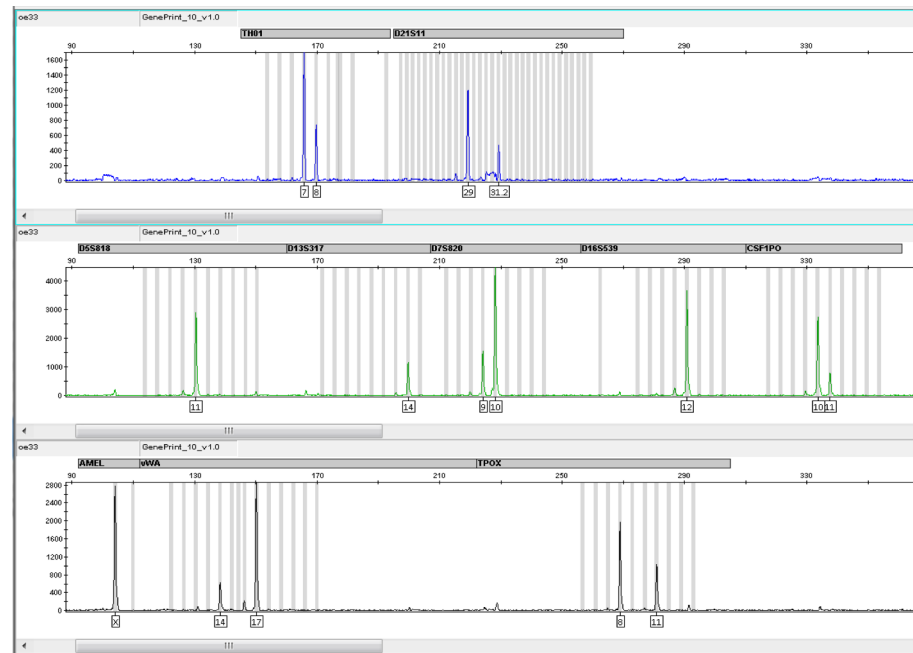

*Peaks that appear to be legitimate stutter or are spectral bleed-through artifacts are not labeled.*

- This report provides a STR profile for the cell line submitted, it does not automatically authenticate the cell line. Authentication is determined by comparison to the STR profile of the original donor tissue or repository cell stock. This STR profile can be used to verify the cell line is human, evaluate profile consistency between provisionally related cell isolates, detect cross-contamination with another human cell line (intra-species contamination), and can be used to compare to profile databases, which we strongly recommend. This STR report does not rule out cross-contamination with an inter-species cell line (non-human).
- Please see the Pdf file *Additional Information* sent with the results for more information about interpreting your STR profile and links to profile databases.

**Principal Investigator:** Yulan Cheng  
**Lab Group:** Meltzer  
**Institution:** Johns Hopkins University, GI  
**Cell Line ID:** oe33  
**Report Date:** November 5, 2018

**Procedure:**

A Promega GenePrint 10 Kit is used to PCR amplify eight short tandem repeat (STR) loci plus a gender determining marker, Amelogenin. The PCR product is electrophoresed on an ABI Prism® 3730xl Genetic Analyzer using an ILS600 internal lane standard (Promega). Data is analyzed using GeneMapper® v 4.0 software (Applied Biosystems). An allelic ladder that contains fragments of the same lengths as many of the known alleles for the loci is used to determine the amplified sample fragments alleles. Appropriate positive and negative controls are used.

**Raw Data Table:**

| Sample Name | Marker  | Allele 1 | Allele 2 | Size 1 | Size 2 | Height 1 | Height 2 | Peak Area 1 | Peak Area 2 |
|-------------|---------|----------|----------|--------|--------|----------|----------|-------------|-------------|
| oe33        | AMEL    | X        | X        | 103.99 | 103.99 | 2784     | 2784     | 18559       | 18559       |
| oe33        | CSF1PO  | 10       | 11       | 333.51 | 337.5  | 2723     | 797      | 20953       | 6329        |
| oe33        | D13S317 | 14       | 14       | 199.73 | 199.73 | 1170     | 1170     | 8029        | 8029        |
| oe33        | D16S539 | 12       | 12       | 290.77 | 290.77 | 3660     | 3660     | 27055       | 27055       |
| oe33        | D21S11  | 29       | 31.2     | 219.33 | 229.28 | 1203     | 475      | 7775        | 2746        |
| oe33        | D5S818  | 11       | 11       | 130.44 | 130.44 | 2903     | 2903     | 20127       | 20127       |
| oe33        | D7S820  | 9        | 10       | 224.11 | 228.12 | 1548     | 4462     | 10807       | 32043       |
| oe33        | TH01    | 7        | 8        | 165.77 | 169.73 | 1702     | 740      | 10483       | 4457        |
| oe33        | TPOX    | 8        | 11       | 268.96 | 280.9  | 1977     | 1025     | 14157       | 7436        |
| oe33        | vWA     | 14       | 17       | 138.35 | 150.22 | 626      | 2861     | 4585        | 19209       |

## Cell Line Short Tandem Repeat (STR) Profile Report

**Principal Investigator:** Yulan Cheng

**Lab Group:** Meltzer

**Institution:** Johns Hopkins University, GI

**Cell Line ID:** skgt4

**Report Date:** November 5, 2018

**Submitting Researcher:** Yulan Cheng

**Sample Type Submitted:** cultured cells

**GeneSifter Tracking ID:** 150777

**Profile Kit Requested:** GenePrint 10 (Promega)

### STR Profile:

| Loci    | skgt4     |
|---------|-----------|
| AMEL    | X         |
| CSF1PO  | 11,15     |
| D13S317 | 9,10      |
| D16S539 | 12,13     |
| D21S11  | 31.2,31.2 |
| D5S818  | 12        |
| D7S820  | 7,11      |
| TH01    | 6,9.3     |
| TPOX    | 8,10      |
| vWA     | 17,19     |

» Loci with one allele listed are homozygous for that STR marker.

*e-Signature Director of Laboratory:*

### STR Graphic Profile:

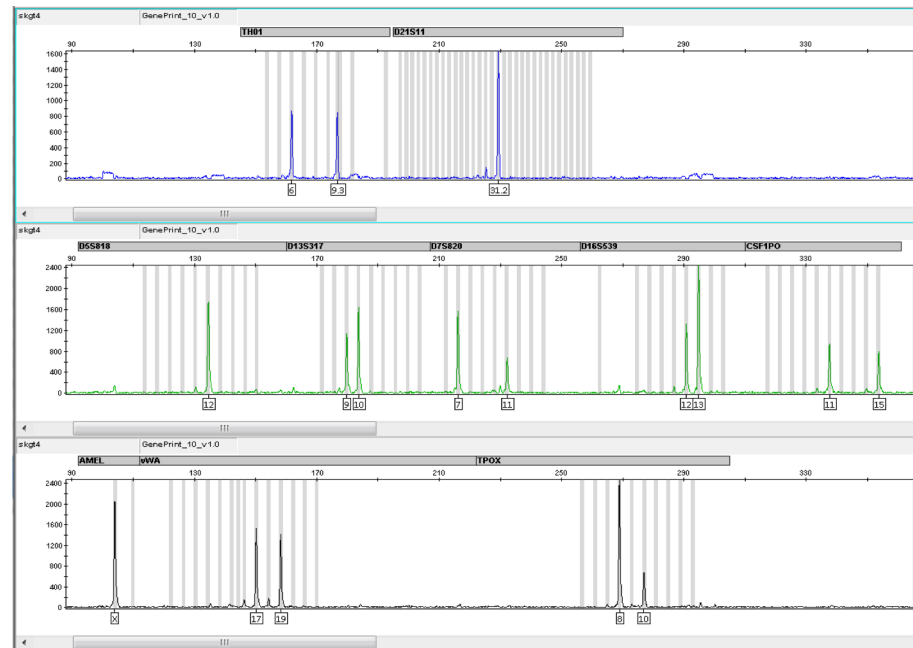

*Peaks that appear to be legitimate stutter or are spectral bleed-through artifacts are not labeled.*

- This report provides a STR profile for the cell line submitted, it does not automatically authenticate the cell line. Authentication is determined by comparison to the STR profile of the original donor tissue or repository cell stock. This STR profile can be used to verify the cell line is human, evaluate profile consistency between provisionally related cell isolates, detect cross-contamination with another human cell line (intra-species contamination), and can be used to compare to profile databases, which we strongly recommend. This STR report does not rule out cross-contamination with an inter-species cell line (non-human).
- Please see the Pdf file *Additional Information* sent with the results for more information about interpreting your STR profile and links to profile databases.

**Principal Investigator:** Yulan Cheng

**Lab Group:** Meltzer

**Institution:** Johns Hopkins University, GI

**Cell Line ID:** skgt4

**Report Date:** November 5, 2018

**Procedure:**

A Promega GenePrint 10 Kit is used to PCR amplify eight short tandem repeat (STR) loci plus a gender determining marker, Amelogenin. The PCR product is electrophoresed on an ABI Prism® 3730xl Genetic Analyzer using an ILS600 internal lane standard (Promega). Data is analyzed using GeneMapper® v 4.0 software (Applied Biosystems). An allelic ladder that contains fragments of the same lengths as many of the known alleles for the loci is used to determine the amplified sample fragments alleles. Appropriate positive and negative controls are used.

**Raw Data Table:**

| Sample Name | Marker  | Allele 1 | Allele 2 | Size 1 | Size 2 | Height 1 | Height 2 | Peak Area 1 | Peak Area 2 |
|-------------|---------|----------|----------|--------|--------|----------|----------|-------------|-------------|
| skgt4       | AMEL    | X        | X        | 103.92 | 103.92 | 2058     | 2058     | 13932       | 13932       |
| skgt4       | CSF1PO  | 11       | 15       | 337.59 | 353.66 | 945      | 796      | 7918        | 6361        |
| skgt4       | D13S317 | 9        | 10       | 179.82 | 183.67 | 1136     | 1648     | 8065        | 11163       |
| skgt4       | D16S539 | 12       | 13       | 290.76 | 294.77 | 1325     | 2449     | 9852        | 18199       |
| skgt4       | D21S11  | 31.2     | 31.2     | 229.29 | 229.29 | 1638     | 1638     | 9973        | 9973        |
| skgt4       | D5S818  | 12       | 12       | 134.61 | 134.61 | 1747     | 1747     | 12388       | 12388       |
| skgt4       | D7S820  | 7        | 11       | 216.13 | 232.24 | 1572     | 682      | 11460       | 5627        |
| skgt4       | TH01    | 6        | 9.3      | 161.83 | 176.68 | 871      | 854      | 5891        | 5302        |
| skgt4       | TPOX    | 8        | 10       | 268.89 | 276.84 | 2478     | 680      | 17325       | 5137        |
| skgt4       | vWA     | 17       | 19       | 150.23 | 158.16 | 1528     | 1418     | 10322       | 9756        |

## Cell Line Short Tandem Repeat (STR) Profile Report

**Principal Investigator:** Yulan Cheng  
**Lab Group:** Meltzer  
**Institution:** Johns Hopkins University  
**Cell Line ID:** JHU-Eso-Ad1  
**Report Date:** January 20, 2020  
**Submitting Researcher:** Yulan Cheng  
**Sample Type Submitted:** Frozen stock  
**GeneSifter Tracking ID:** 163120  
**Profile Kit Requested:** GenePrint 10 (Promega)

### STR Profile:

| Loci    | JHU-Eso-Ad1 |
|---------|-------------|
| AMEL    | X           |
| CSF1PO  | 10          |
| D13S317 | 11          |
| D16S539 | 10,12       |
| D21S11  | 30          |
| D5S818  | 11          |
| D7S820  | 10,12       |
| TH01    | 6,7         |
| TPOX    | 8,9         |
| vWA     | 18,19       |

» Loci with one allele listed are homozygous for that STR marker.

#### e-Signature Director of Laboratory:

Laura Kasch

Digitally signed by Laura Kasch  
DN: cn=Laura Kasch, o=Genetic Resources Core  
Facility, ou=Johns Hopkins University,  
email=lkasch@jhmi.edu, c=US  
Date: 2020.01.20 09:25:38 -07'00'

### STR Graphic Profile:

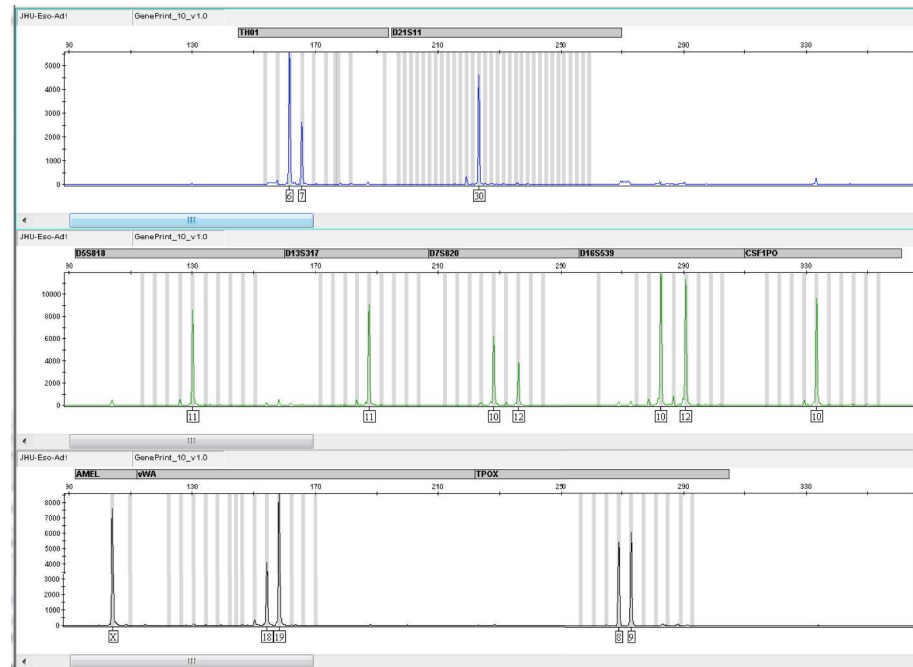

*Peaks that appear to be legitimate stutter or are spectral bleed-through artifacts are not labeled.*

- This report provides a STR profile for the cell line submitted, it does not automatically authenticate the cell line. Authentication is determined by comparison to the STR profile of the original donor tissue or cell stock. This STR profile can be used to verify the cell line is human, evaluate profile consistency between provisionally related cell isolates, detect cross-contamination with another human cell line (intra-species contamination), and to compare to profile databases, which we strongly recommend. This STR report does not rule out cross-contamination with an inter-species cell line (non-human).
- Please see the Pdf file *Additional Information* sent with the results for more information about interpreting your STR profile and links to profile databases.

**Principal Investigator:**

**Institution:**

**Cell Line ID:**

**Report Date:**

**Procedure:**

A Promega GenePrint 10 Kit is used to PCR amplify eight short tandem repeat (STR) loci plus a gender determining marker, Amelogenin. The PCR product is electrophoresed on an ABI Prism® 3730xl Genetic Analyzer using an ILS600 internal lane standard (Promega). Data is analyzed using GeneMapper® v 4.0 software (Applied Biosystems). An allelic ladder that contains fragments of the same lengths as many of the known alleles for the loci is used to determine the amplified sample fragments alleles. Appropriate positive and negative controls are used.

**Raw Data Table:**

| Sample Name | Marker  | Allele 1 | Allele 2 | Size 1 | Size 2 | Height 1 | Height 2 | Peak Area 1 | Peak Area 2 |
|-------------|---------|----------|----------|--------|--------|----------|----------|-------------|-------------|
| JHU-Eso-Ad1 | AMEL    | X        | X        | 103.98 | 103.98 | 7566     | 7566     | 47267       | 47267       |
| JHU-Eso-Ad1 | CSF1PO  | 10       | 10       | 333.48 | 333.48 | 9599     | 9599     | 69010       | 69010       |
| JHU-Eso-Ad1 | D13S317 | 11       | 11       | 187.5  | 187.5  | 9102     | 9102     | 57229       | 57229       |
| JHU-Eso-Ad1 | D16S539 | 10       | 12       | 282.54 | 290.59 | 11945    | 11337    | 83168       | 80503       |
| JHU-Eso-Ad1 | D21S11  | 30       | 30       | 223.23 | 223.23 | 4628     | 4628     | 29239       | 29239       |
| JHU-Eso-Ad1 | D5S818  | 11       | 11       | 130.18 | 130.18 | 8591     | 8591     | 53693       | 53693       |
| JHU-Eso-Ad1 | D7S820  | 10       | 12       | 228.02 | 236.09 | 6203     | 3852     | 41002       | 25405       |
| JHU-Eso-Ad1 | TH01    | 6        | 7        | 161.61 | 165.63 | 5593     | 2631     | 34300       | 16276       |
| JHU-Eso-Ad1 | TPOX    | 8        | 9        | 268.95 | 272.9  | 5399     | 6063     | 36219       | 41175       |
| JHU-Eso-Ad1 | vWA     | 18       | 19       | 154.21 | 158.19 | 4104     | 8578     | 27072       | 56406       |



## Cell Line Short Tandem Repeat (STR) Profile Report

**Principal Investigator:** Yulan Cheng

**Lab Group:** Meltzer

**Institution:** JHU

**Cell Line ID:** Flo-1

**Report Date:** October 21, 2019

**Submitting Researcher:** Yulan Cheng

**Sample Type Submitted:** Cultured cells, frozen stock

**GeneSifter Tracking ID:** 160766

**Profile Kit Requested:** GenePrint 10 (Promega)

### STR Profile:

| Loci    | Flo_1   |
|---------|---------|
| AMEL    | X       |
| CSF1PO  | 11      |
| D13S317 | 11      |
| D16S539 | 12,13   |
| D21S11  | 30,32.2 |
| D5S818  | 12,14   |
| D7S820  | 8       |
| TH01    | 6       |
| TPOX    | 9,11    |
| vWA     | 16      |

» Loci with one allele listed are homozygous for that STR marker.

#### *e-Signature Director of Laboratory:*

Laura Kasch

Digitally signed by Laura Kasch  
DN: cn=Laura Kasch, o=JHU GRCF,  
ou=FAF, email=lkasch@jhmi.edu, c=US  
Date: 2019.10.21 13:47:11 -04'00'

### STR Graphic Profile:

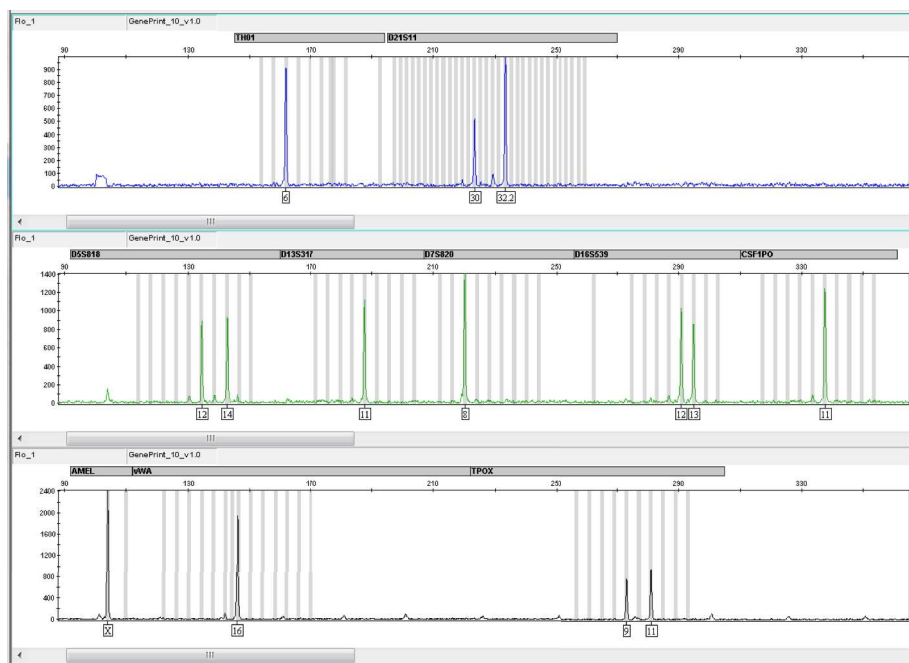

*Peaks that appear to be legitimate stutter or are spectral bleed-through artifacts are not labeled.*

- This report provides a STR profile for the cell line submitted, it does not automatically authenticate the cell line. Authentication is determined by comparison to the STR profile of the original donor tissue or cell stock. This STR profile can be used to verify the cell line is human, evaluate profile consistency between provisionally related cell isolates, detect cross-contamination with another human cell line (intra-species contamination), and to compare to profile databases, which we strongly recommend. This STR report does not rule out cross-contamination with an inter-species cell line (non-human).
- Please see the Pdf file *Additional Information* sent with the results for more information about interpreting your STR profile and links to profile databases.

**Principal Investigator:** Yulan Cheng

**Lab Group:** Meltzer

**Institution:** JHU

**Cell Line ID:** Flo-1

**Report Date:** October 21, 2019

**Procedure:**

A Promega GenePrint 10 Kit is used to PCR amplify eight short tandem repeat (STR) loci plus a gender determining marker, Amelogenin. The PCR product is electrophoresed on an ABI Prism® 3730xl Genetic Analyzer using an ILS600 internal lane standard (Promega). Data is analyzed using GeneMapper® v 4.0 software (Applied Biosystems). An allelic ladder that contains fragments of the same lengths as many of the known alleles for the loci is used to determine the amplified sample fragments alleles. Appropriate positive and negative controls are used.

**Raw Data Table:**

| Sample Name | Marker  | Allele 1 | Allele 2 | Size 1 | Size 2 | Height 1 | Height 2 | Peak Area 1 | Peak Area 2 |
|-------------|---------|----------|----------|--------|--------|----------|----------|-------------|-------------|
| Flo_1       | AMEL    | X        | X        | 104    | 104    | 2421     | 2421     | 14324       | 14324       |
| Flo_1       | CSF1PO  | 11       | 11       | 337.55 | 337.55 | 1240     | 1240     | 9146        | 9146        |
| Flo_1       | D13S317 | 11       | 11       | 187.6  | 187.6  | 1122     | 1122     | 7228        | 7228        |
| Flo_1       | D16S539 | 12       | 13       | 290.73 | 294.78 | 1032     | 860      | 7842        | 6292        |
| Flo_1       | D21S11  | 30       | 32.2     | 223.34 | 233.3  | 521      | 997      | 3404        | 6374        |
| Flo_1       | D5S818  | 12       | 14       | 134.5  | 142.77 | 889      | 932      | 5388        | 5935        |
| Flo_1       | D7S820  | 8        | 8        | 220.11 | 220.11 | 1406     | 1406     | 9343        | 9343        |
| Flo_1       | TH01    | 6        | 6        | 161.68 | 161.68 | 910      | 910      | 5805        | 5805        |
| Flo_1       | TPOX    | 9        | 11       | 272.98 | 280.98 | 766      | 938      | 5126        | 6518        |
| Flo_1       | vWA     | 16       | 16       | 146.19 | 146.19 | 1940     | 1940     | 12265       | 12265       |

## Cell Line Short Tandem Repeat (STR) Profile Report

**Principal Investigator:** Yulan Cheng

**Lab Group:** Meltzer

**Institution:** Johns Hopkins University

**Cell Line ID:** QHTRT new

**Report Date:** January 27, 2020

**Submitting Researcher:** Yulan Cheng

**Sample Type Submitted:** Cultured cells

**GeneSifter Tracking ID:** 163364

**Profile Kit Requested:** GenePrint 10 (Promega)

### STR Profile:

| Loci    | QHTRT new |
|---------|-----------|
| AMEL    | X,Y       |
| CSF1PO  | 12        |
| D13S317 | 12,14     |
| D16S539 | 12,13     |
| D21S11  | 27,31.2   |
| D5S818  | 11,12     |
| D7S820  | 7,8       |
| TH01    | 7,9.3     |
| TPOX    | 8,9       |
| vWA     | 17        |

» Loci with one allele listed are homozygous for that STR marker.

*e-Signature Director of Laboratory:*

### STR Graphic Profile:

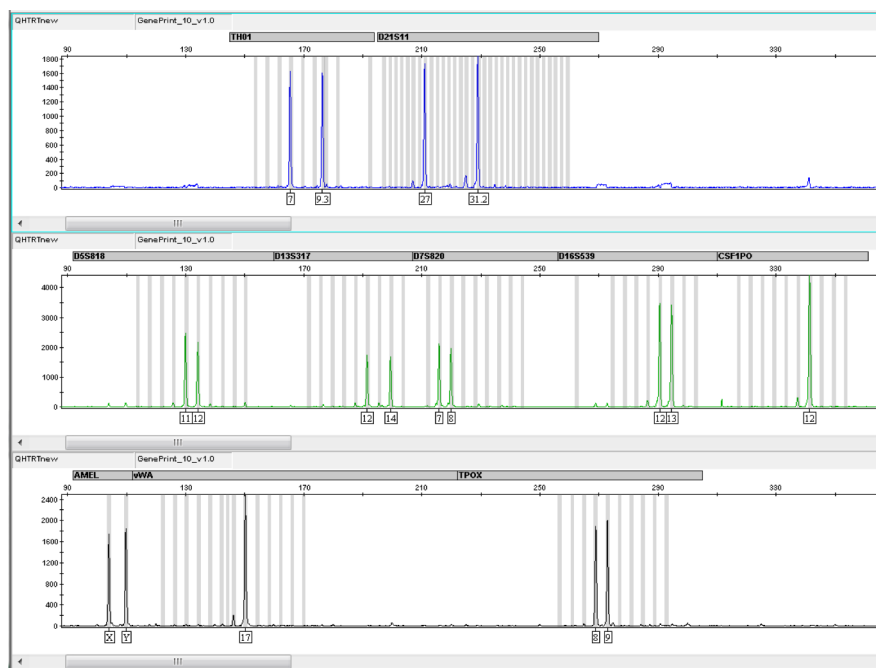

*Peaks that appear to be legitimate stutter or are spectral bleed-through artifacts are not labeled.*

- This report provides a STR profile for the cell line submitted, it does not automatically authenticate the cell line. Authentication is determined by comparison to the STR profile of the original donor tissue or cell stock. This STR profile can be used to verify the cell line is human, evaluate profile consistency between provisionally related cell isolates, detect cross-contamination with another human cell line (intra-species contamination), and to compare to profile databases, which we strongly recommend. This STR report does not rule out cross-contamination with an inter-species cell line (non-human).
- Please see the Pdf file *Additional Information* sent with the results for more information about interpreting your STR profile and links to profile databases.

**Principal Investigator:** Yulan Cheng

**Lab Group:** Meltzer

**Institution:** Johns Hopkins University

**Cell Line ID:** QHTRT new

**Report Date:** January 27, 2020

**Procedure:**

A Promega GenePrint 10 Kit is used to PCR amplify eight short tandem repeat (STR) loci plus a gender determining marker, Amelogenin. The PCR product is electrophoresed on an ABI Prism® 3730xl Genetic Analyzer using an ILS600 internal lane standard (Promega). Data is analyzed using GeneMapper® v 4.0 software (Applied Biosystems). An allelic ladder that contains fragments of the same lengths as many of the known alleles for the loci is used to determine the amplified sample fragments alleles. Appropriate positive and negative controls are used.

**Raw Data Table:**

| Sample Name | Marker  | Allele 1 | Allele 2 | Size 1 | Size 2 | Height 1 | Height 2 | Peak Area 1 | Peak Area 2 |
|-------------|---------|----------|----------|--------|--------|----------|----------|-------------|-------------|
| QHTRT new   | AMEL    | X        | Y        | 104.02 | 109.79 | 1742     | 1845     | 10995       | 11403       |
| QHTRT new   | CSF1PO  | 12       | 12       | 341.3  | 341.3  | 4418     | 4418     | 33657       | 33657       |
| QHTRT new   | D13S317 | 12       | 14       | 191.38 | 199.36 | 1742     | 1698     | 11220       | 11063       |
| QHTRT new   | D16S539 | 12       | 13       | 290.51 | 294.49 | 3481     | 3429     | 25842       | 24940       |
| QHTRT new   | D21S11  | 27       | 31.2     | 210.89 | 228.87 | 1729     | 1839     | 11207       | 12139       |
| QHTRT new   | D5S818  | 11       | 12       | 129.91 | 134.12 | 2481     | 2185     | 15885       | 13939       |
| QHTRT new   | D7S820  | 7        | 8        | 215.83 | 219.87 | 2132     | 1977     | 14354       | 13474       |
| QHTRT new   | TH01    | 7        | 9.3      | 165.37 | 176.24 | 1630     | 1603     | 10326       | 10142       |
| QHTRT new   | TPOX    | 8        | 9        | 268.86 | 272.89 | 1887     | 2003     | 12986       | 13969       |
| QHTRT new   | vWA     | 17       | 17       | 150.16 | 150.16 | 2495     | 2495     | 16663       | 16663       |

## Cell Line Short Tandem Repeat (STR) Profile Report

**Principal Investigator:** Yulan Cheng

**Lab Group:** Meltzer

**Institution:** Johns Hopkins University

**Cell Line ID:** GiHTRT new

**Report Date:** January 27, 2020

**Submitting Researcher:** Yulan Cheng

**Sample Type Submitted:** Cultured cells

**GeneSifter Tracking ID:** 163364

**Profile Kit Requested:** GenePrint 10 (Promega)

### STR Profile:

| Loci    | GiHTRT new |
|---------|------------|
| AMEL    | X,Y        |
| CSF1PO  | 9,13       |
| D13S317 | 8,10       |
| D16S539 | 11,12      |
| D21S11  | 31.2       |
| D5S818  | 12         |
| D7S820  | 8,11       |
| TH01    | 8,9.3      |
| TPOX    | 8          |
| vWA     | 17         |

» Loci with one allele listed are homozygous for that STR marker.

*e-Signature Director of Laboratory:*

### STR Graphic Profile:

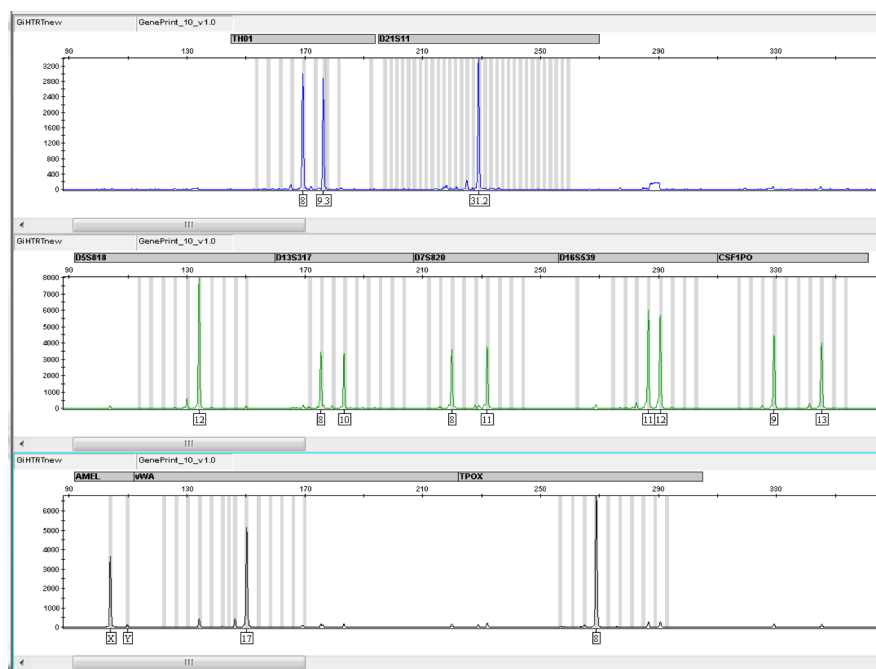

*Peaks that appear to be legitimate stutter or are spectral bleed-through artifacts are not labeled.*

- This report provides a STR profile for the cell line submitted, it does not automatically authenticate the cell line. Authentication is determined by comparison to the STR profile of the original donor tissue or cell stock. This STR profile can be used to verify the cell line is human, evaluate profile consistency between provisionally related cell isolates, detect cross-contamination with another human cell line (intra-species contamination), and to compare to profile databases, which we strongly recommend. This STR report does not rule out cross-contamination with an inter-species cell line (non-human).
- Please see the Pdf file *Additional Information* sent with the results for more information about interpreting your STR profile and links to profile databases.

**Principal Investigator:** Yulan Cheng

**Lab Group:** Meltzer

**Institution:** Johns Hopkins University

**Cell Line ID:** GiHTRT new

**Report Date:** January 27, 2020

**Procedure:**

A Promega GenePrint 10 Kit is used to PCR amplify eight short tandem repeat (STR) loci plus a gender determining marker, Amelogenin. The PCR product is electrophoresed on an ABI Prism® 3730xl Genetic Analyzer using an ILS600 internal lane standard (Promega). Data is analyzed using GeneMapper® v 4.0 software (Applied Biosystems). An allelic ladder that contains fragments of the same lengths as many of the known alleles for the loci is used to determine the amplified sample fragments alleles. Appropriate positive and negative controls are used.

**Raw Data Table:**

| Sample Name | Marker  | Allele 1 | Allele 2 | Size 1 | Size 2 | Height 1 | Height 2 | Peak Area 1 | Peak Area 2 |
|-------------|---------|----------|----------|--------|--------|----------|----------|-------------|-------------|
| GiHTRT new  | AMEL    | X        | Y        | 103.94 | 109.79 | 3636     | 115      | 23006       | 747         |
| GiHTRT new  | CSF1PO  | 9        | 13       | 329.12 | 345.25 | 4470     | 4013     | 32633       | 30135       |
| GiHTRT new  | D13S317 | 8        | 10       | 175.43 | 183.24 | 3472     | 3359     | 22531       | 21405       |
| GiHTRT new  | D16S539 | 11       | 12       | 286.46 | 290.54 | 5988     | 5669     | 42966       | 41229       |
| GiHTRT new  | D21S11  | 31.2     | 31.2     | 228.89 | 228.89 | 3411     | 3411     | 22516       | 22516       |
| GiHTRT new  | D5S818  | 12       | 12       | 134.09 | 134.09 | 8049     | 8049     | 51597       | 51597       |
| GiHTRT new  | D7S820  | 8        | 11       | 219.85 | 231.88 | 3584     | 3793     | 24208       | 25653       |
| GiHTRT new  | TH01    | 8        | 9.3      | 169.31 | 176.23 | 3005     | 2880     | 19799       | 18071       |
| GiHTRT new  | TPOX    | 8        | 8        | 268.89 | 268.89 | 6782     | 6782     | 46877       | 46877       |
| GiHTRT new  | vWA     | 17       | 17       | 150.27 | 150.27 | 5153     | 5153     | 34251       | 34251       |

## Supplementary Sources

### Sequence and characteristics of the SHH promoter region (1kb) and its 5'utr

Cccactgcctgcccccccccaacacctgcaatggcctccacacaccagcgcacacactggccccactctctcccctgtgctggg  
 gtgcagccccagacctgctttgccatccacctgacgcccgcagttcactctgtaactgcccttgagcacgctccatcccattgcagag  
 ctctacaaaaaaaaaatgtattaattgaagcacaataaaagagcagtattttacatttttaaggcacttaagcatttcaaataccagtcttt  
 aagttatggctactcataattatcctcggtccacagaggctgagtcttcaggaggggctcagtcctctttctcaaaatgcagggagagccag  
 cctgcactataaagtccctggggaagaaaaataataacagctgggcagctgtgccctcaaatgtgtgagcgcactctgtgcttgatgactg  
 aagcttgcgggggttaaaactgtcctttaaacttaagtgttttaactgaagcacctaccattccagggaagtgcaggggaaacgcaag  
 gatgtacaaaagccgggagtaactgctgttaccacaagacatgcgctcctcccgccacctttatcttagaaagatttttttttaac  
 tcgaatccttcaggtgaaaataaa**gcaacagcagcaacagaaaa**aaaaaacgtagctcttctcagggttaacatcagaagacaagctgtgc  
 ggctttggccaatcagatgcgccctggcagctataatagtgctaaaggcagcctctctcacaagctctccaggcttctaccatttaaat  
 cagactctttttgtcttttgattgctgtctcgcgaccaactccgatgtgtccggttatcagcggccggcagcctgccattccagcccctgtctgg  
 gtggggagcgggtggagagtgccccgcagccgcggggcaaggttatataggaagagaaagaGCGAGGCAGCCAGCG  
 AGGGAGAGAGCGAGCGGGCGAGCCGGAGCGAGGAAGGGAAAGCGCAAGAGAGAG  
 CGCACACGCACACACCCGCCGCGCGCACTCGCGCACGGACCCGCACGGGGACAGCT  
 CGGAAGTCATCAGTTCCATGGGCGAG

### SHH Chip F1

OLIGO            start len    tm    gc%    any    3' seq

LEFT PRIMER        437    20    60.06    55.00    4.00    2.00    atgtgtgagcgcactctgtgc

RIGHT PRIMER        576    20    59.99    50.00    6.00    0.00    ccgctttgtgtacatcctt

SEQUENCE SIZE: 1000

INCLUDED REGION SIZE: 1000

PRODUCT SIZE: 140, PAIR ANY COMPL: 4.00, PAIR 3' COMPL: 0.00

1 LEFT PRIMER        351    20    59.96    50.00    4.00    2.00    ctcaaaatgcagggagagc

RIGHT PRIMER        456    20    60.06    55.00    4.00    2.00    gcacagagtcgctcacacat

PRODUCT SIZE: 106, PAIR ANY COMPL: 4.00, PAIR 3' COMPL: 3.00

OLIGO            start len    tm    gc%    any    3' seq

LEFT PRIMER        127    20    60.18    45.00    3.00    0.00    gcaacagcagcaacagaaaa

RIGHT PRIMER 256 20 59.86 55.00 7.00 2.00 gagagaggctgcctttagca

SEQUENCE SIZE: 446

INCLUDED REGION SIZE: 446

PRODUCT SIZE: 130, PAIR ANY COMPL: 5.00, PAIR 3' COMPL: 0.00



Figure S1: *miR205HG* overexpression caused a substantial decrease in EAC invasion in FLO-1 (58% reduction; p-value <0.001) and OE33 (39% reduction; p-value <0.03) cells

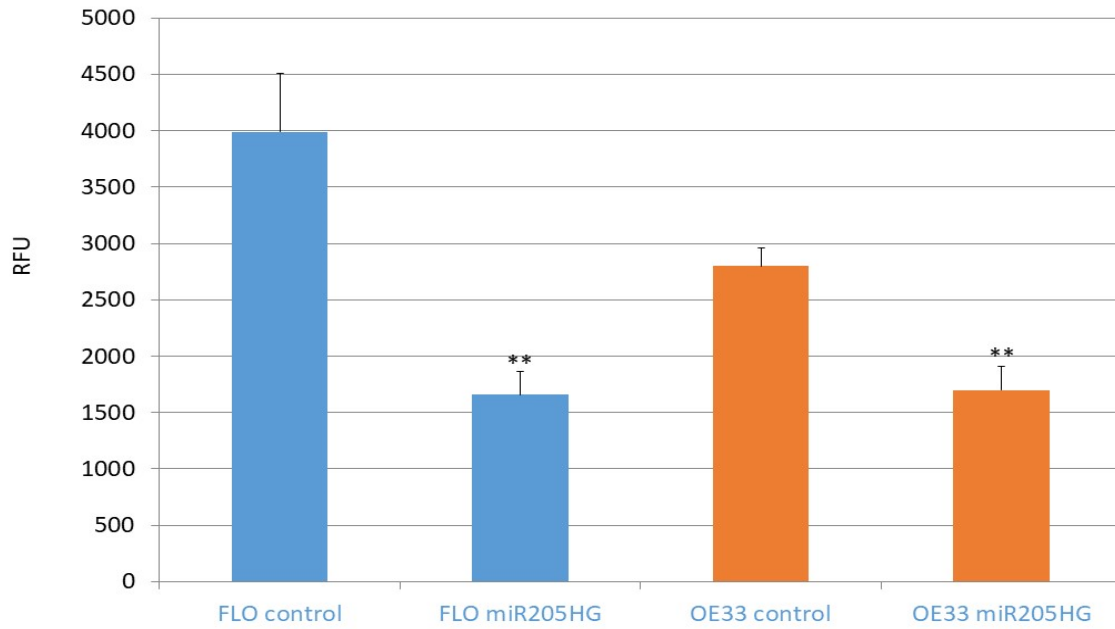

**Figure S2.** PTCH1 expression in NE-BE tissue pairs. 14 matched NE-BE tissue pairs were assessed for PTCH1 expression by qRT-PCR. PTCH1 was upregulated relative to NE in 13 out of 14 BE tissues studied (average fold-change 23.5, paired t-test p-value <0.0001). (This is the same tissue pairs used in Figure 1E)

### PTCH1 relative expression in BE tissues (normalized to paired normal tissues)

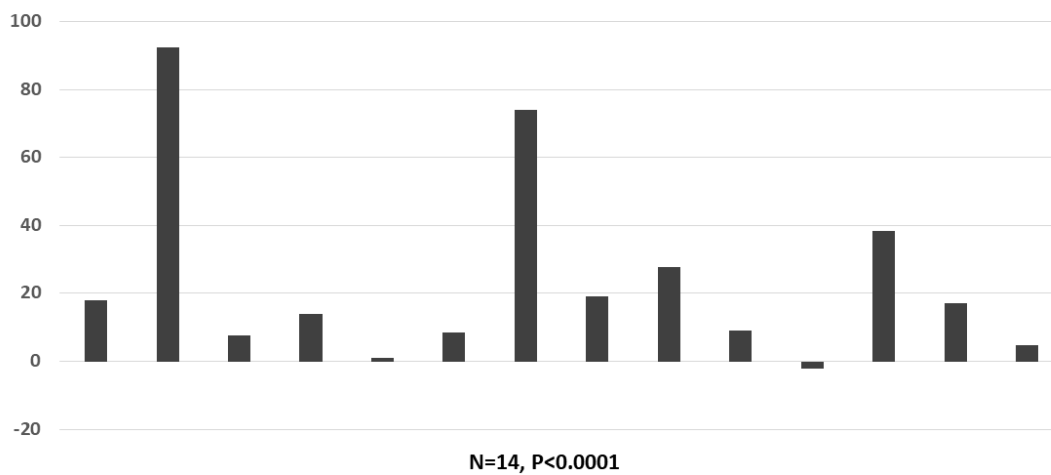

200 bp      500bp      1000bp      1500bp      2000bp      3000bp      4000bp

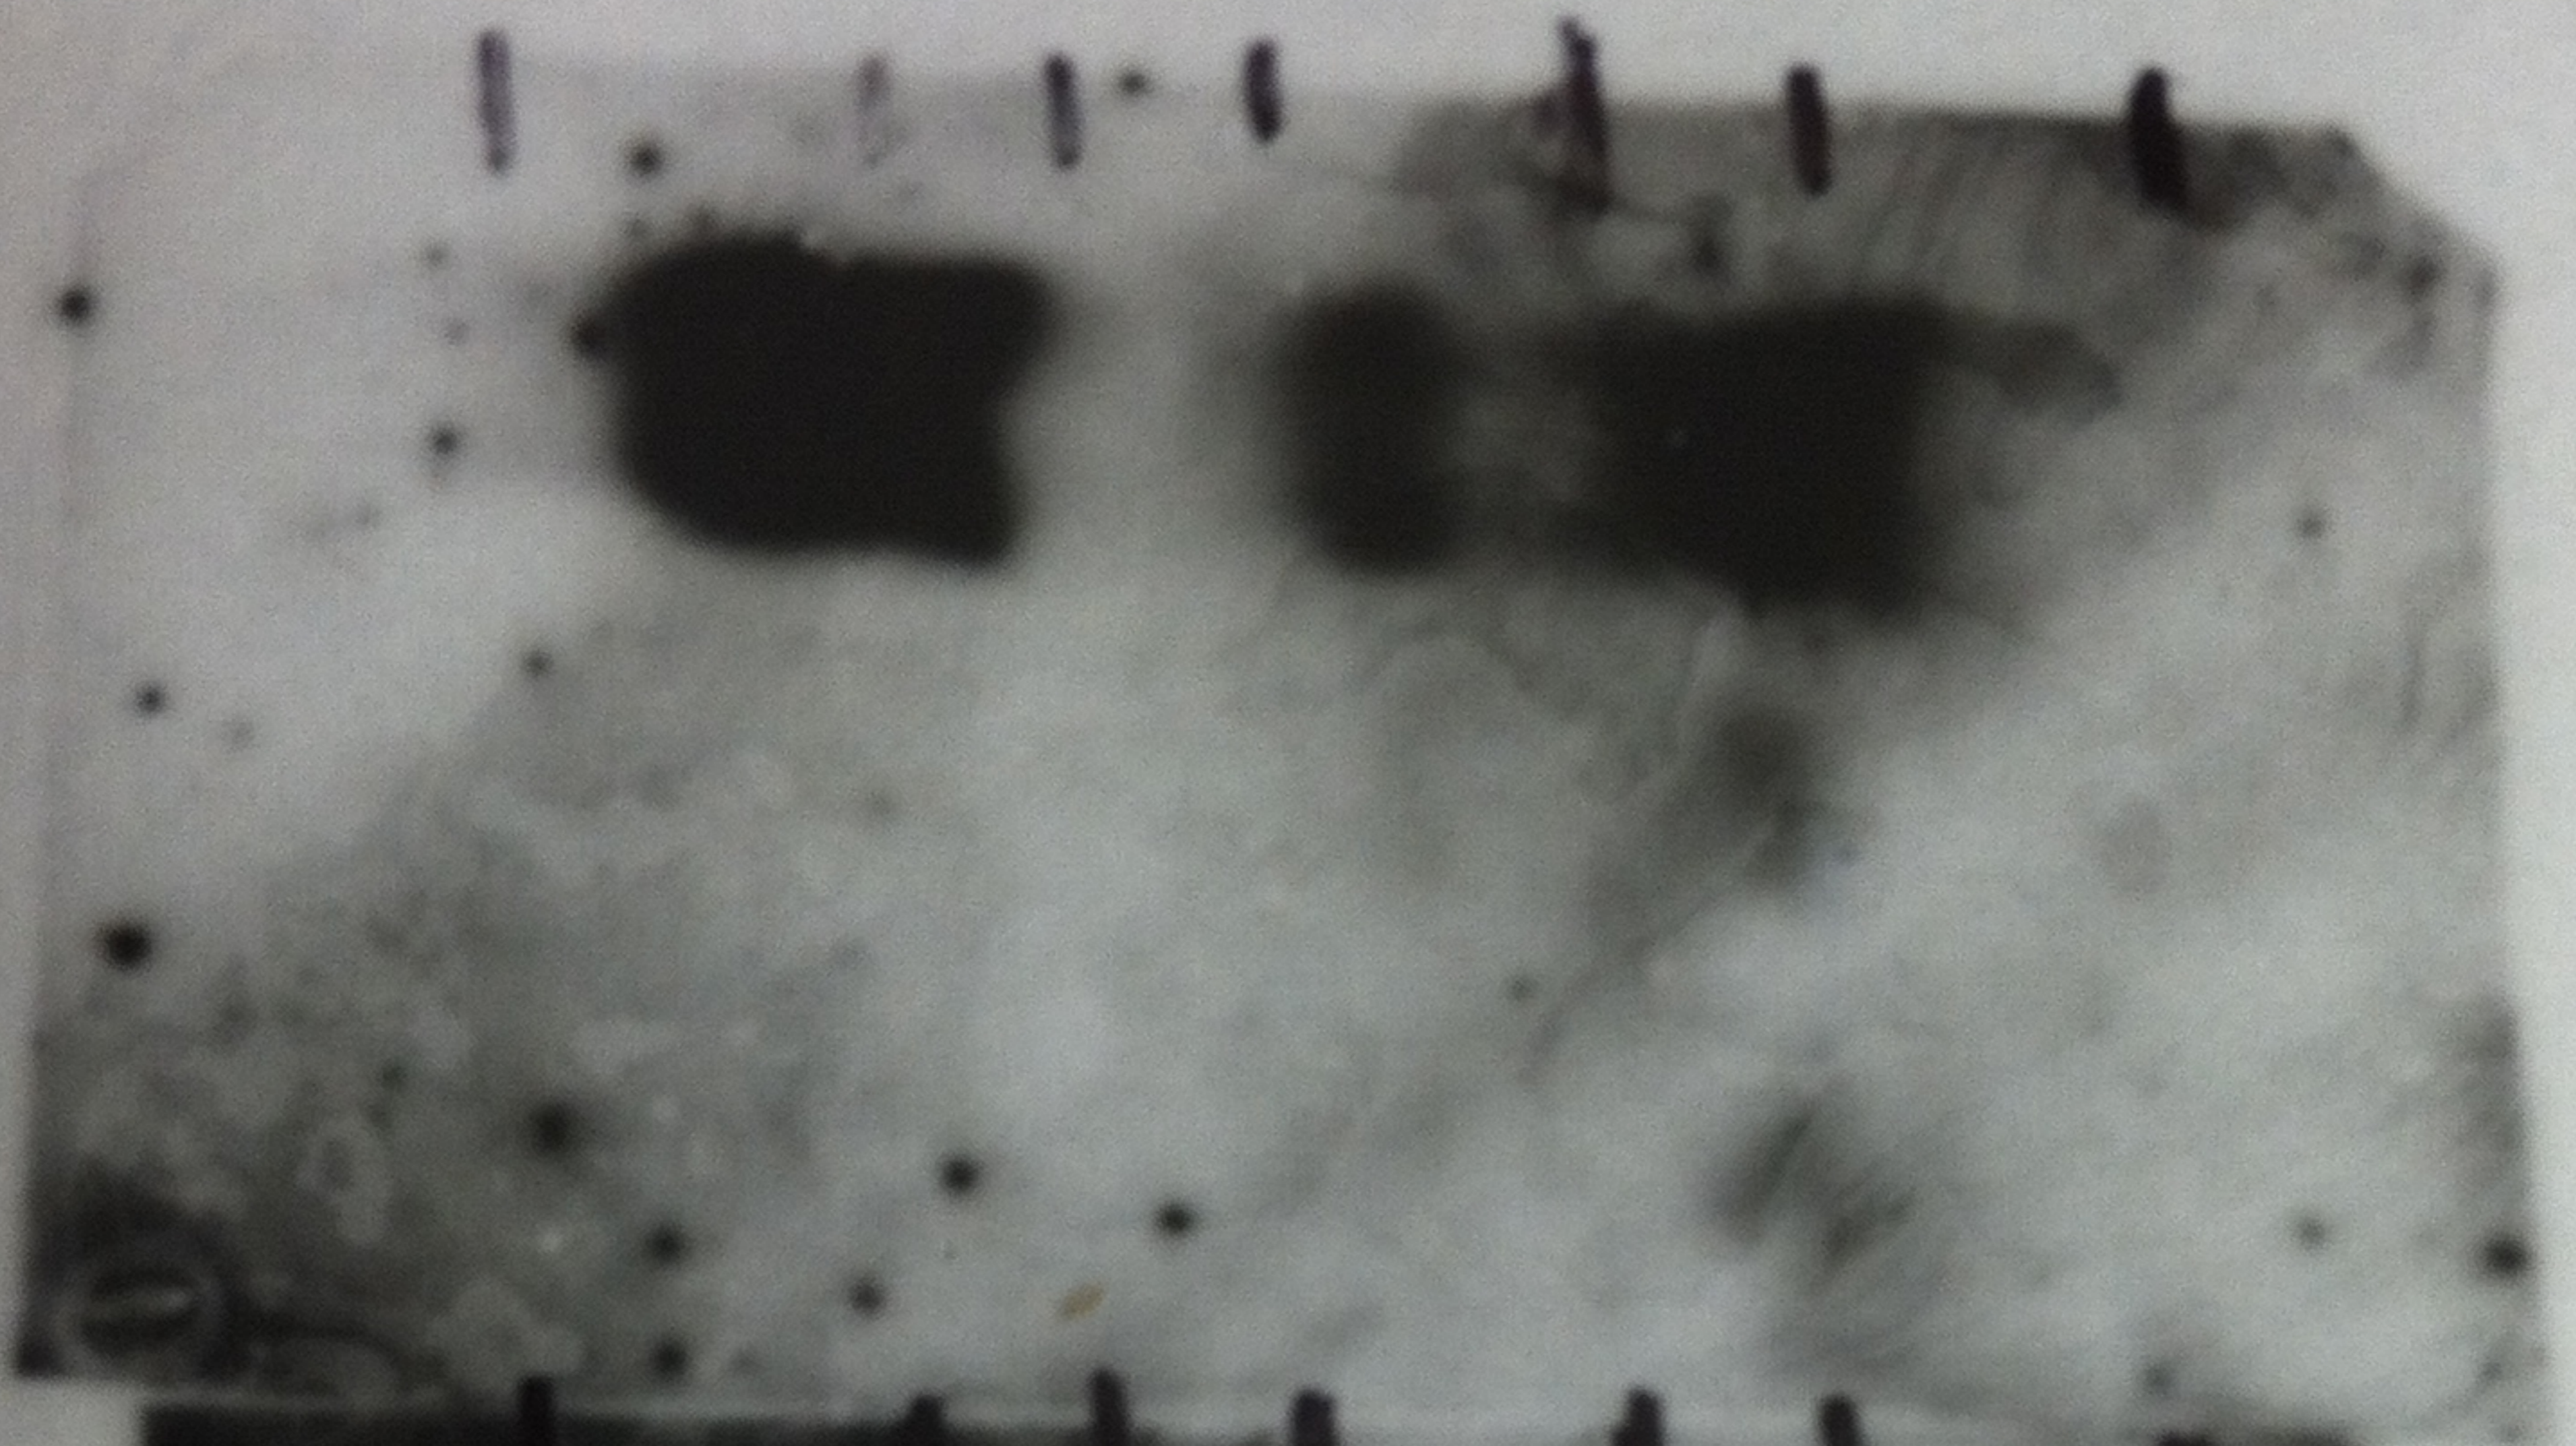

miR205HG

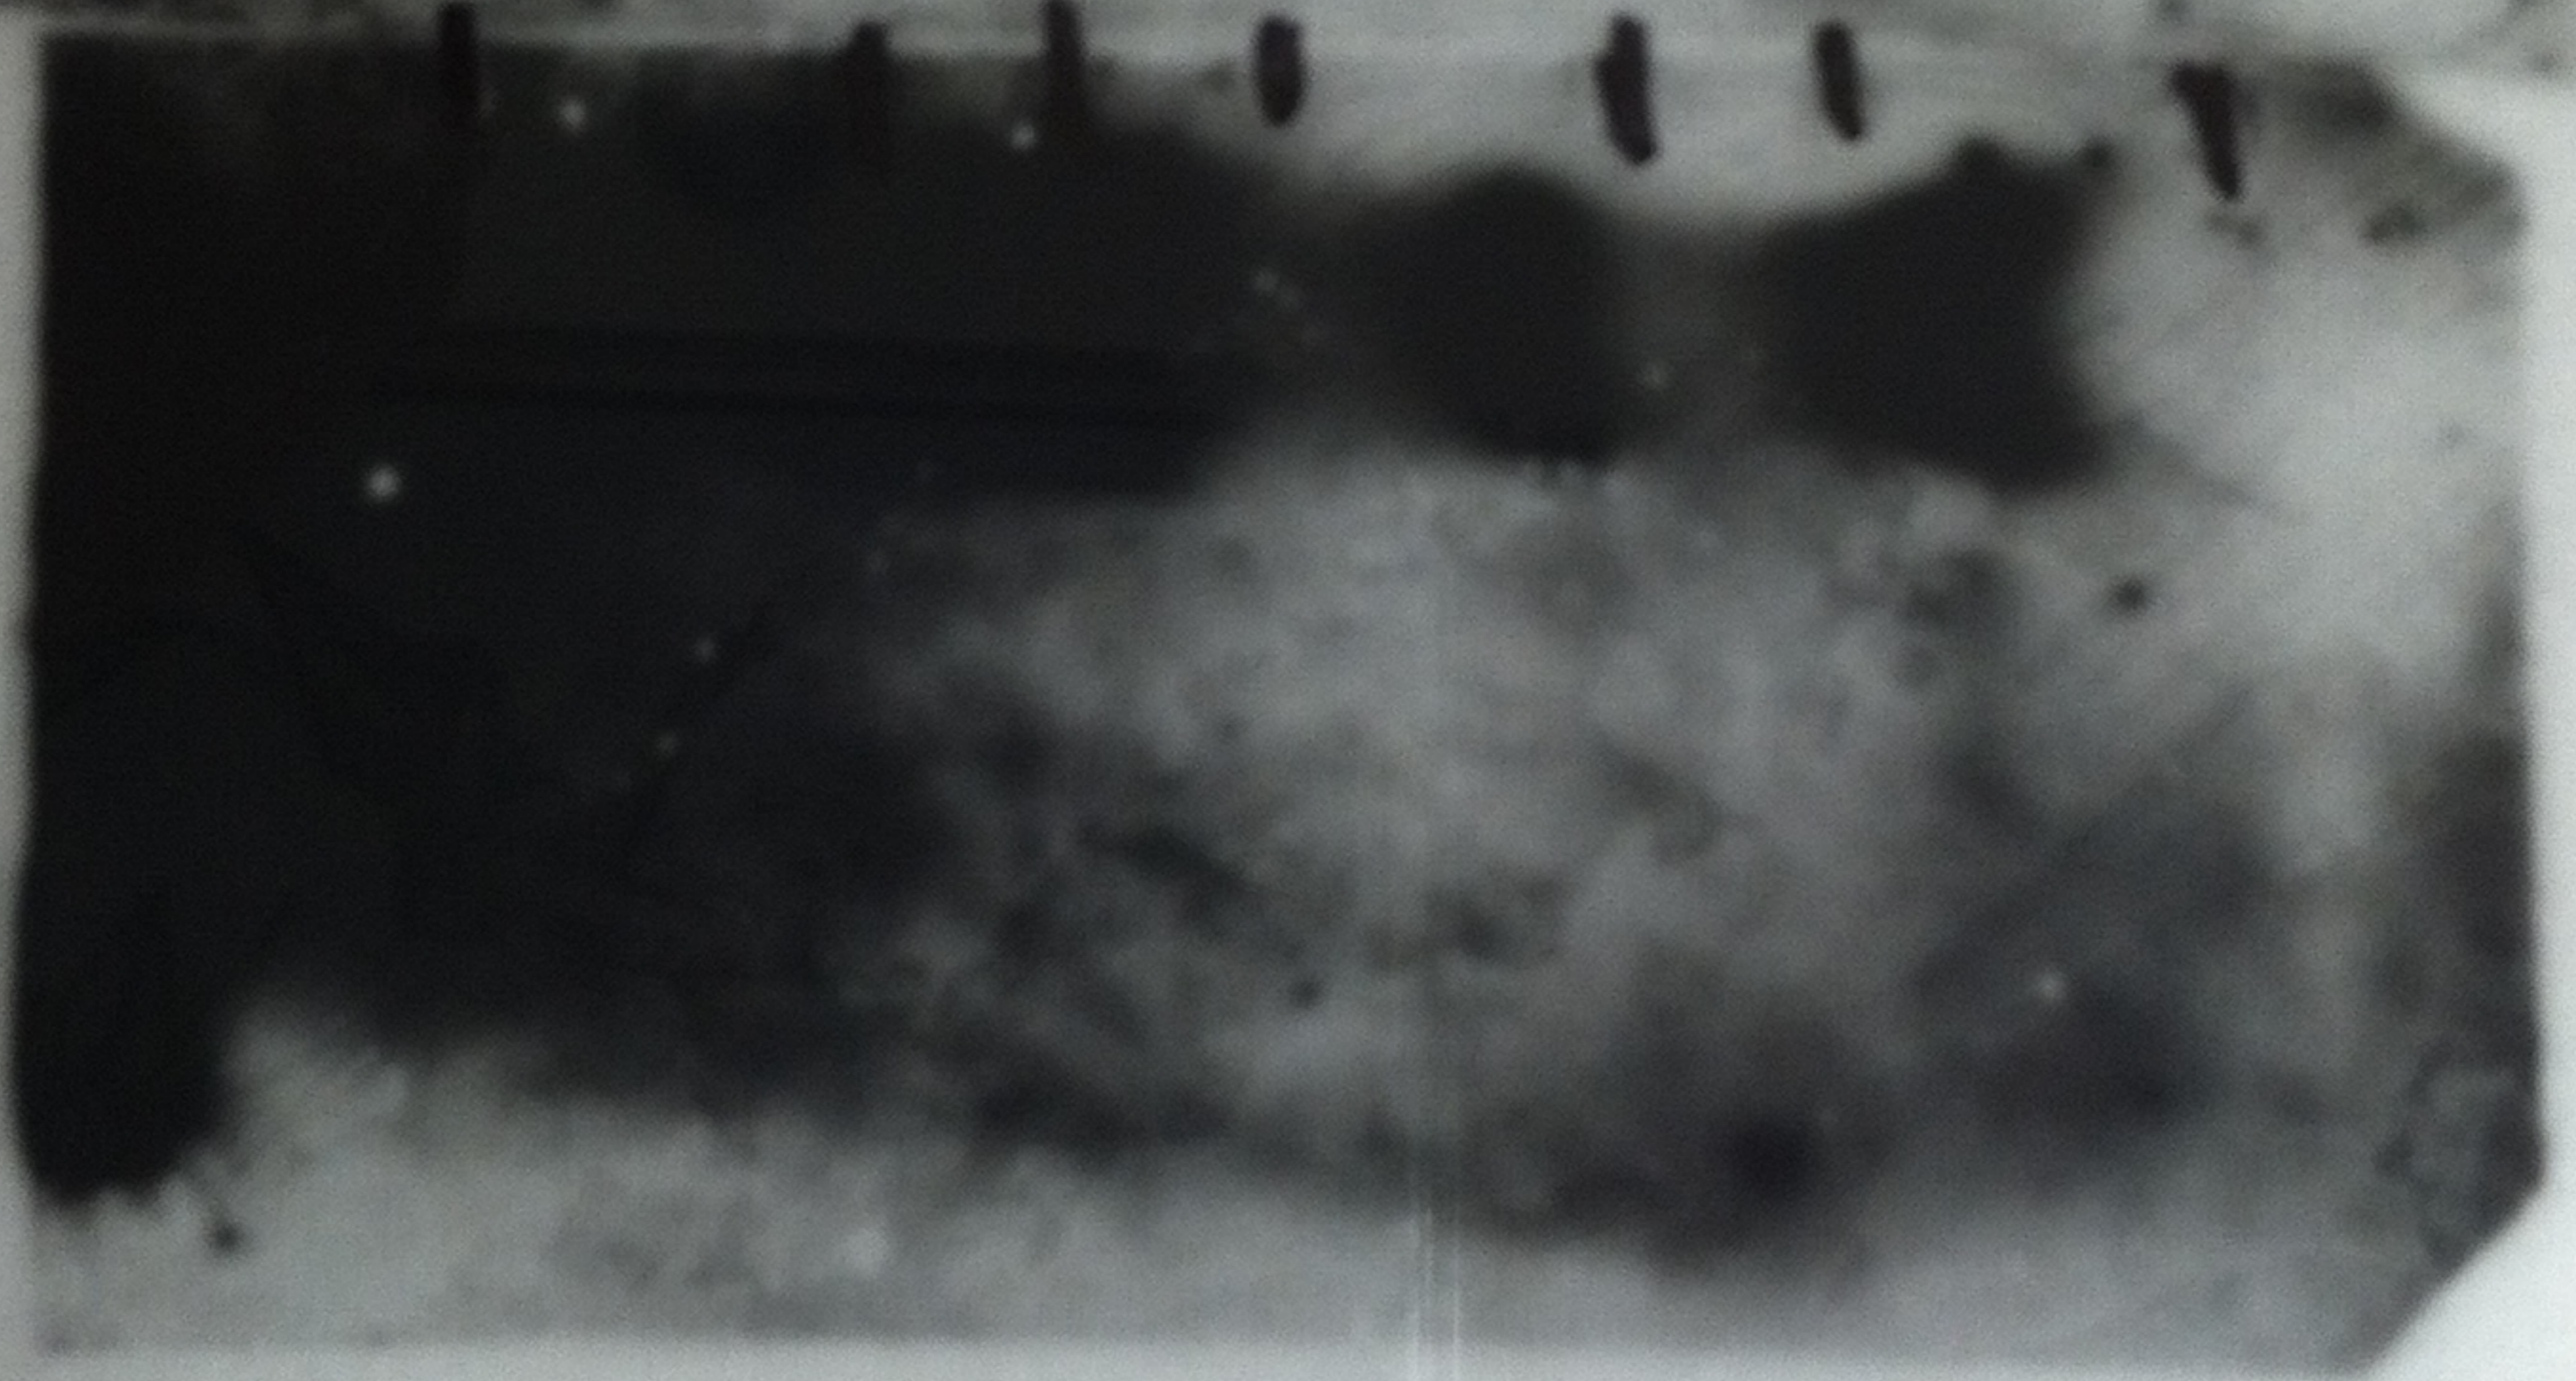

D  
Damaged  
blot -not  
used

200 bp      500bp      1000bp      1500bp      2000bp      3000bp      4000bp

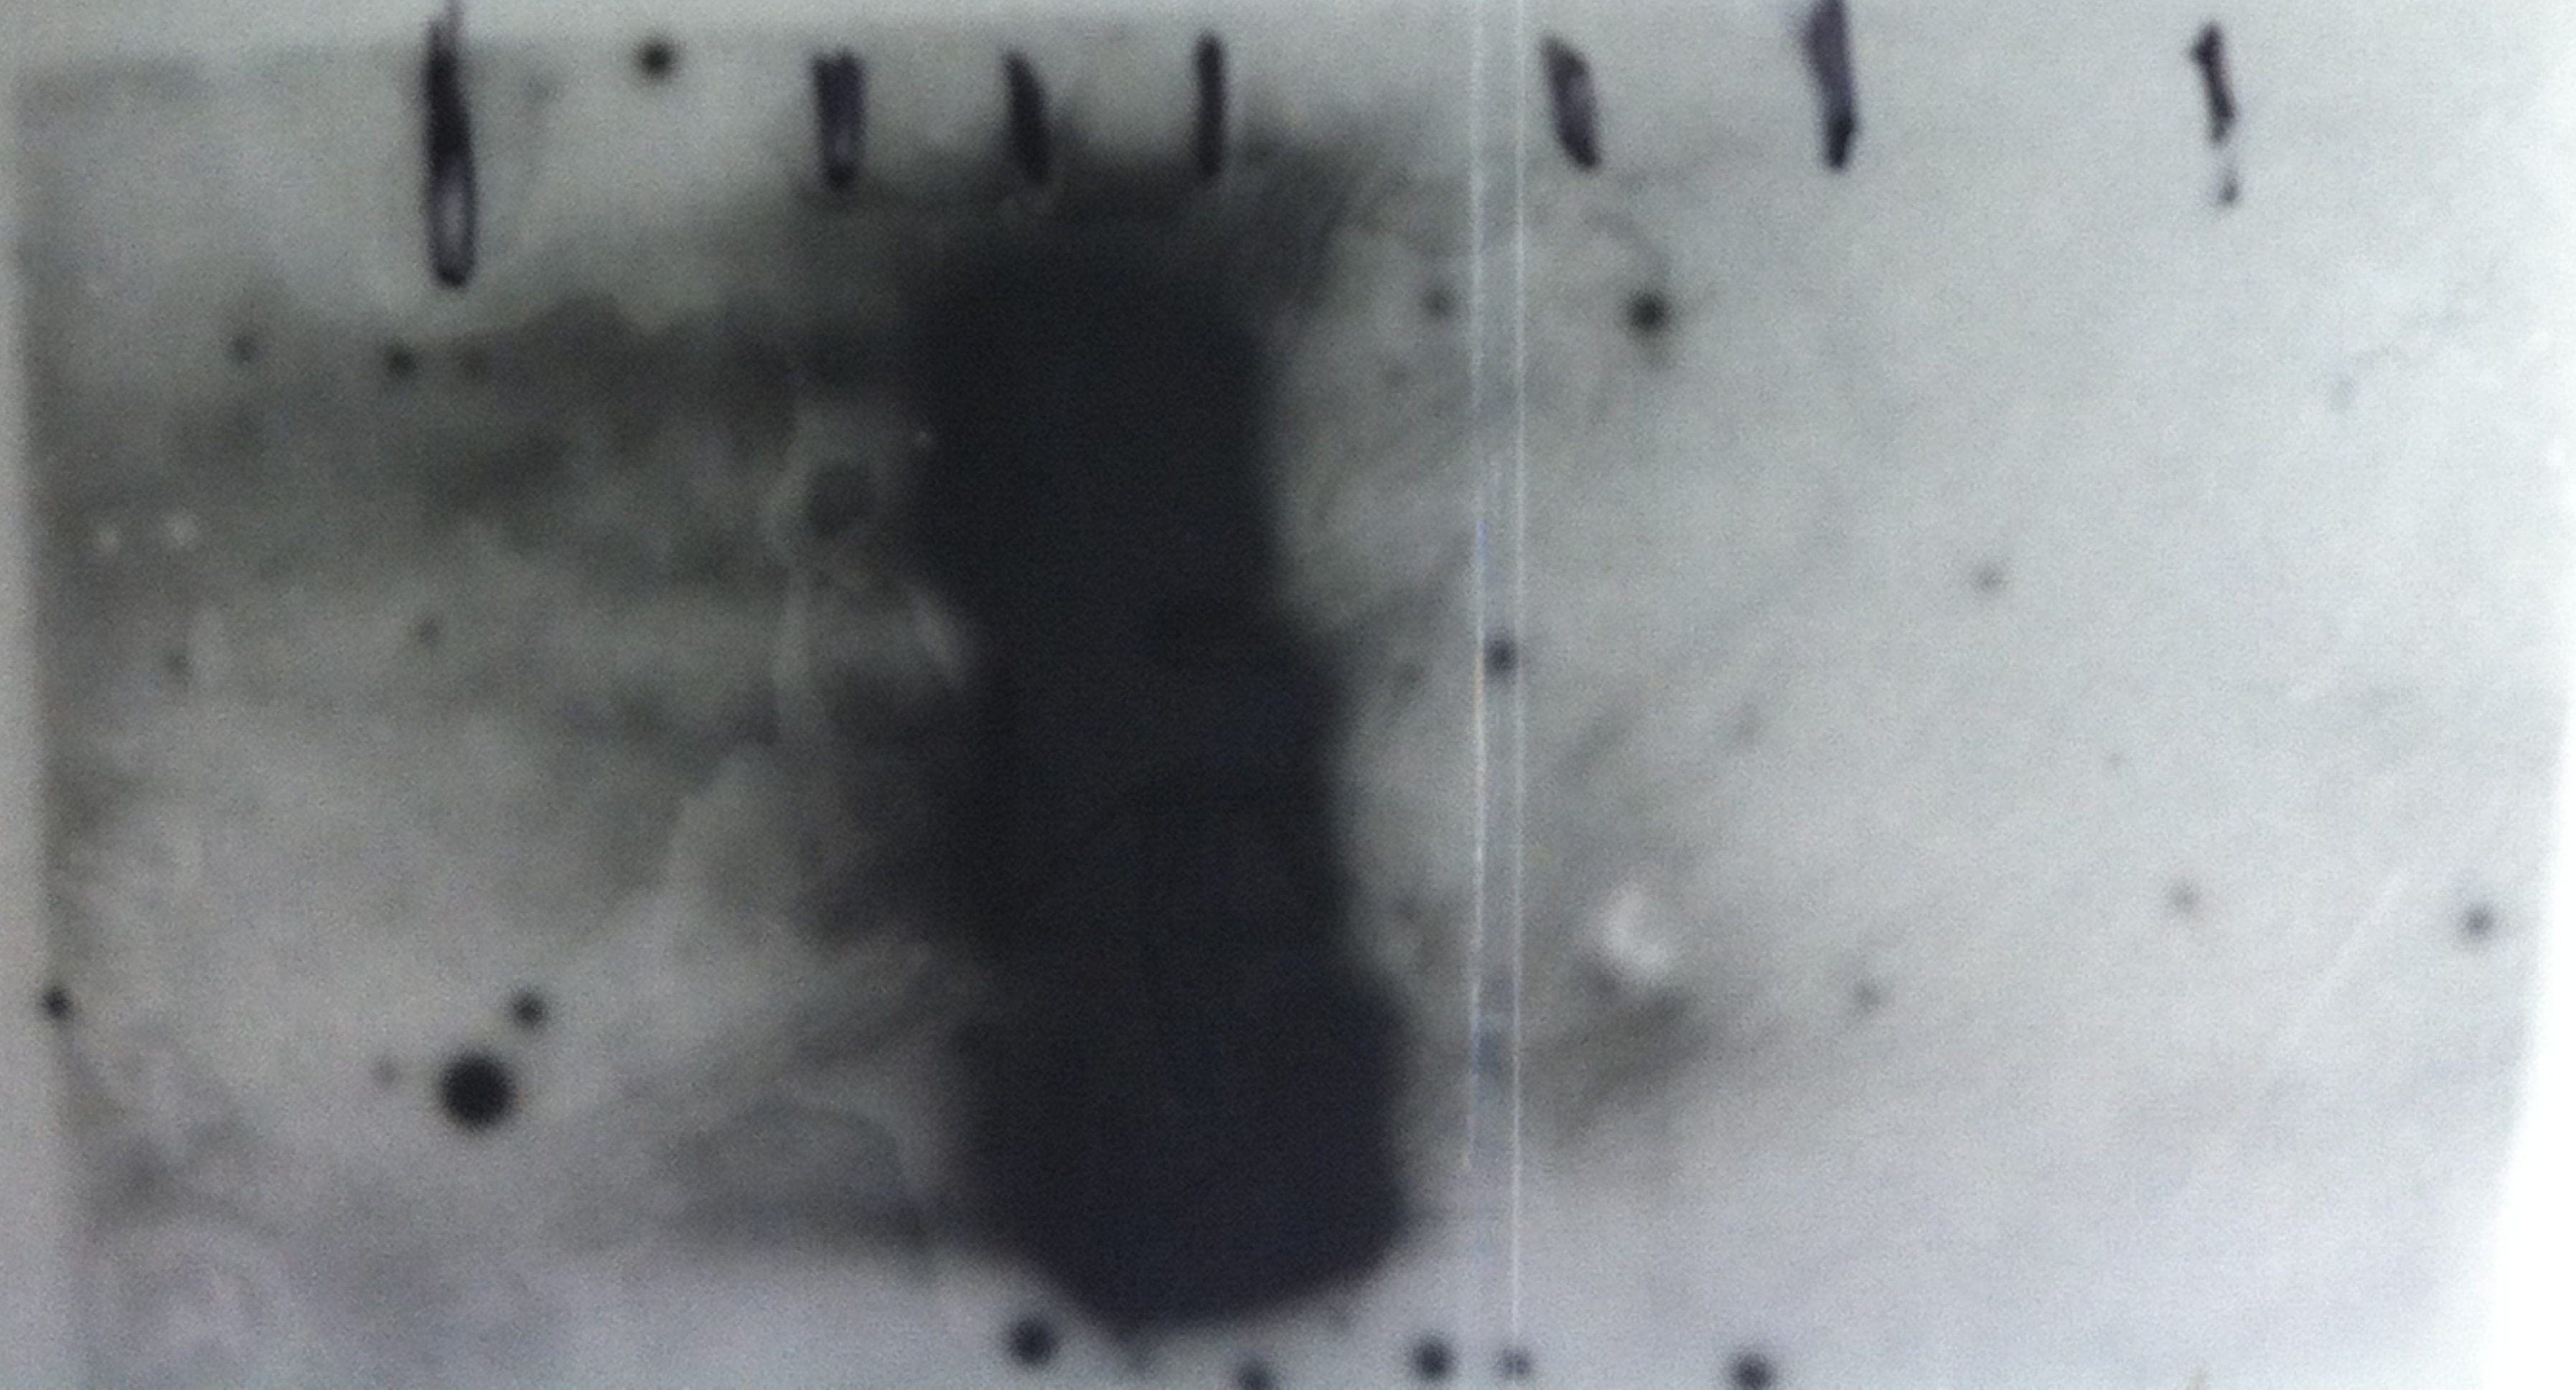

GAPDH

1/12/15

# ORIGINAL BLOT FIGURE 18

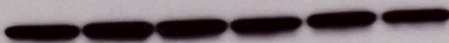

1/12/15

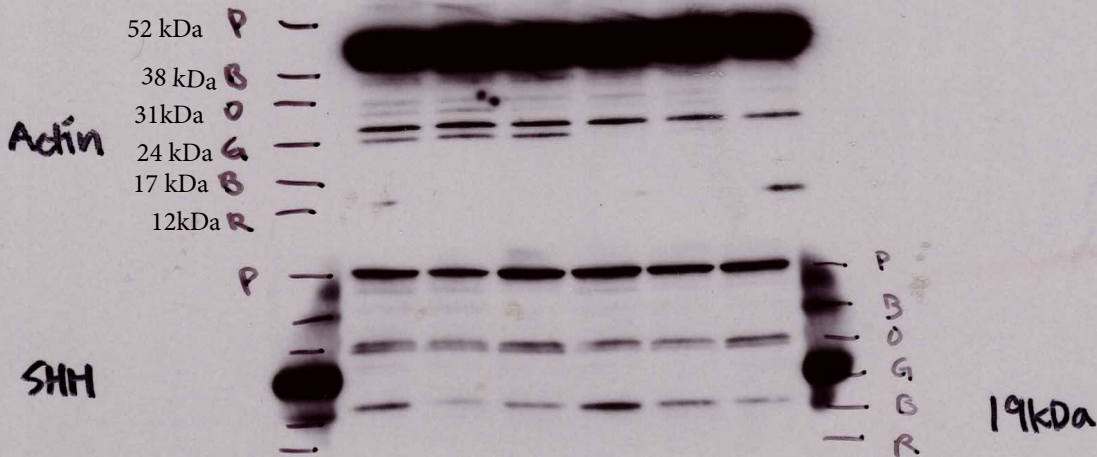

Top picture: Actin, identical blot as bottom picture, but short exposure (less than 5 sec) in order to get better picture for publication.

Bottom picture: Actin and SHH as labeled. We used Rainbow marker. From the bottom Red (12 kDa), Blue 17, green 24, Orange 31, Blue 38, Purple 52.
